# Supplementary material for: Estimating the mutation load in human genomes
Source: Springer Nature journal article supplement (doi:10.1038/nrg3931), 2015-05-12
Supplement: 41576_2015_BFnrg3931_MOESM18_ESM.pdf [file 41576_2015_BFnrg3931_MOESM18_ESM.pdf]

Supplementary information S3 (figure)

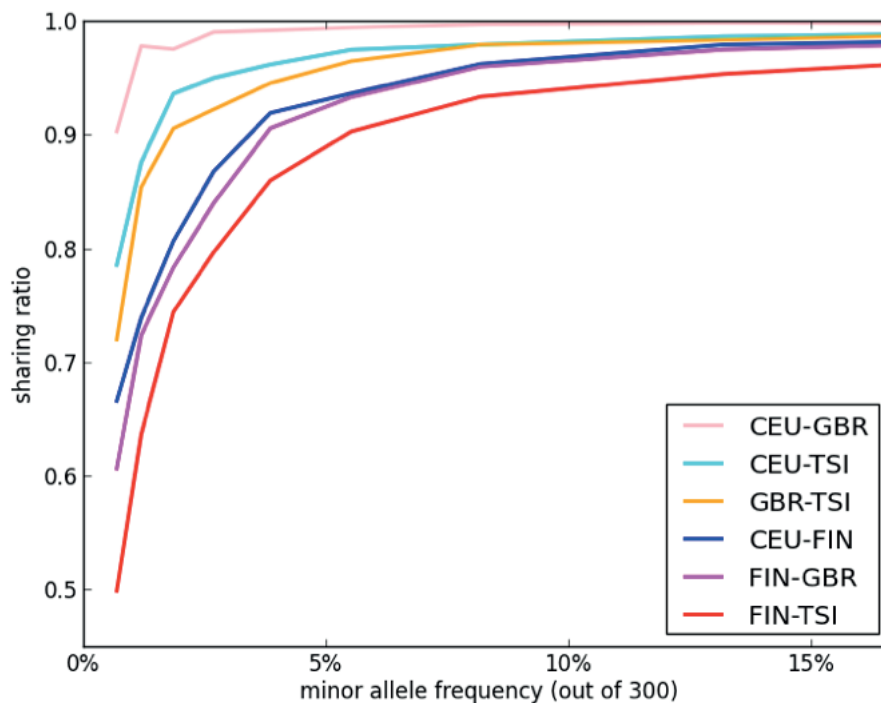

*Allele sharing versus allele frequency among European populations.* The sharing ratio is the probability that two minor alleles drawn randomly in a pooled sample come from different populations, relative to the panmictic expectation<sup>1</sup>. A panmictic population has a ratio of 1, and completely diverged populations have a ratio of 0. GBR: Great Britain; CEU: Central European from Utah; TSI: Tuscan; FIN: Finnish.

#### References:

1. Gravel, S. *et al.* Demographic history and rare allele sharing among human populations. *Proceedings of the National Academy of Sciences* **108**, 11983–11988 (2011).
